# Supplementary material
Source: Royal Society of Chemistry journal article supplement (doi:10.1039/d6tc00371k)
Supplement: d6tc00371k1.pdf [file d6tc00371k1.pdf]

## Supplementary Information

### **Dynamic Phosphorescent Gel with Dual Supramolecular Interactions for Visualization of Moisture Monitoring**

*Bin Lu,<sup>a</sup> Xiaohan Lin,<sup>ab</sup> Chen Xu,<sup>\*ab</sup> Han Xu,<sup>a</sup> Shaodong Zhou,<sup>ab</sup> Xiang Ma,<sup>c</sup> Chao  
Qian<sup>\*ab</sup>*

<sup>a</sup> Polytechnic Institute of Zhejiang University, Zhejiang University, Hangzhou 310015,  
P. R. China

E-mail: [xuchenn@zju.edu.cn](mailto:xuchenn@zju.edu.cn); [qianchao@zju.edu.cn](mailto:qianchao@zju.edu.cn)

<sup>b</sup> Institute of Zhejiang University - Quzhou, Quzhou 324000, P. R. China

<sup>c</sup> Key Laboratory for Advanced Materials and Feringa Nobel Prize Scientist Joint  
Research Center, Frontiers Science Center for Materiobiology and Dynamic Chemistry,  
School of Chemistry and Molecular Engineering, East China University of Science and  
Technology, Shanghai 200237, P. R. China

## Contents

|                                                                                     |     |
|-------------------------------------------------------------------------------------|-----|
| 1. Materials and general procedures. ....                                           | S3  |
| 2. Synthesis and characterization of U <sub>py</sub> 3-BrBP and intermediates. .... | S3  |
| 3. Preparation of the supramolecular gel. ....                                      | S14 |
| 4. Characterization of U <sub>py</sub> 3-BrBP-CB[n] complex. ....                   | S14 |
| 5. SEM images of assembly in solution and supramolecular gels. ....                 | S21 |
| 6. References. ....                                                                 | S23 |

## 1. Materials and general procedures.

**1.1 Materials.** All reagents were purchased from Adamas-beta® or TCI Chemicals and used without further purification. Solvents were purified according to standard laboratory methods. The molecular structures were confirmed using  $^1\text{H}$  NMR,  $^{13}\text{C}$  NMR and high-resolution ESI mass spectroscopy.

**1.2 General methods.** All reagents used for the synthesis or measurements were commercially available without further purification. Water used in tests and to prepare solution was ultrapure.  $^1\text{H}$  NMR and  $^{13}\text{C}$  NMR spectra were recorded on Brüker AV-500 spectrometers. Coupling constants  $J$  are given in Hz. Chemical shifts were shown in ppm relative to the solvent residual peak was used as the internal standard. Molecular masses were determined by a Waters LCT premier XE spectrometer. ESI high-resolution time-of-flight mass spectra were measured on a Waters XEVO G2 TOF mass spectrometer. Fourier Transform Infrared Transmission Spectra (FT-IR) were measured on an INVENIO R instrument, and the solid powders of the samples were measured in  $\text{cm}^{-1}$  after preparation of the samples by KBr flakes. UV-Vis absorption spectra were measured on a Varian-Cary 500 spectrophotometer. Fluorescence emission spectra and excitation spectra were measured using an Edinburgh FLS1000 transient and steady state fluorescence spectrometer. Absolute quantum yields of photoluminescence were measured using an integrating sphere on an Edinburgh FLS1000 transient and steady-state fluorescence spectrometer.

## 2. Synthesis and characterization of Upy3-BrBP and intermediates.

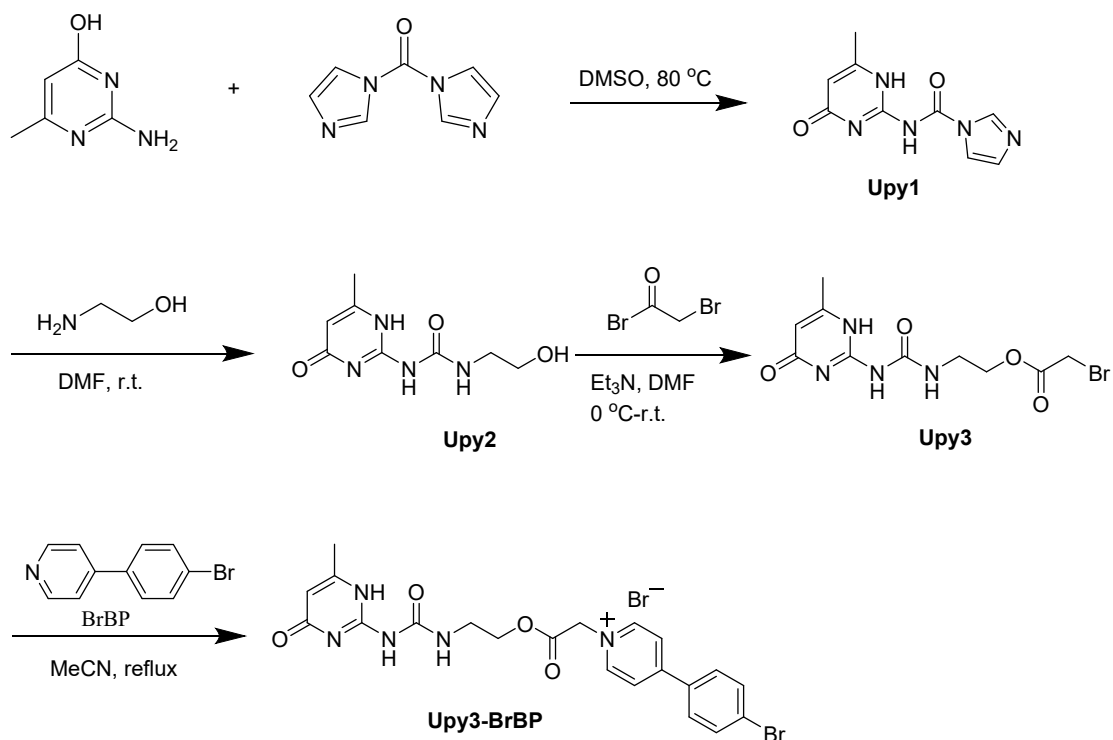

**Fig.S1** Synthetic route of **Upy3-BrBP**.

**Synthesis of *N*-(6-methyl-4-oxo-1,4-dihydropyrimidin-2-yl)-1*H*-imidazole-1-carboxamide (Upy1).** Compound Upy1 was synthesized according to literature procedure.<sup>[1]</sup>

**Synthesis of 1-(2-hydroxyethyl)-3-(6-methyl-4-oxo-1,4-dihydropyrimidin-2-yl)urea (Upy2).** To Upy1 (20 mmol, 1.0 eq) and ethanolamine (30 mmol, 1.5 eq) was added DMF (60 mL). The mixture was stirred at room temperature for 3 hours. The mixture was filtered and washed with acetonitrile to afford white solid as product (78% yield, 3.346 g).

**Synthesis of 2-(3-(6-methyl-4-oxo-1,4-dihydropyrimidin-2-yl)ureido)ethyl 2-bromoacetate (Upy3).** Compound Upy2 (1.0 eq) was mixed with DMF and triethylamine (1.2 eq) at 0 °C under an inert gas atmosphere. Bromoacetyl bromide (1.3 eq) was added slowly followed by an overnight reaction at room temperature. The reaction was quenched by addition of water and the partition was extracted with dichloromethane and the organic phases were combined. The organic phase was

washed three times with saturated sodium bicarbonate solution and dried over anhydrous sodium sulfate, filtered and concentrated to give a light brown solid. Refining in ethanol gave the product as a white solid.

**Synthesis of 4-(4-bromophenyl)-pyridine (BrBP).** Compound **BrBP** was synthesized according to literature procedure.<sup>[2]</sup>

**Synthesis of 4-(4-bromophenyl)-1-(2-(2-(3-(6-methyl-4-oxo-1,4-dihydropyrimidin-2-yl)ureido)ethoxy)-2-oxoethyl)pyridin-1-ium (Upy3-BrBP).** Compound **Upy3** (0.5 mmol, 1.0 eq) and **BrBP** (0.55 mmol, 1.1 eq) were homogeneously dispersed in acetonitrile. The mixture was heated to 90 °C for two days. A light brown solid precipitated, cooled and filtered, the filter cake was washed with acetonitrile and subsequently dried under vacuum to give the pure product. (43% yield, 122 mg). <sup>1</sup>H NMR (DMSO-*d*<sub>6</sub>, 500 MHz) δ 9.06 (d, *J* = 6.5 Hz, 2H), 8.61 (d, *J* = 6.5 Hz, 2H), 8.05 (d, *J* = 8.5 Hz, 2H), 7.88 (d, *J* = 8.5 Hz, 2H), 5.78 (s, 1H), 5.66 (s, 2H), 4.27 (t, *J* = 5.5 Hz, 2H), 3.47 (d, *J* = 5.5 Hz, 2H), 2.11 (s, 3H). <sup>13</sup>C NMR (DMSO-*d*<sub>6</sub>, 125 MHz) δ 166.8, 155.1, 146.8, 133.2, 133.0, 130.8, 127.1, 124.7, 65.5, 60.1, 38.5. ESI-HRMS calcd. for [C<sub>21</sub>H<sub>21</sub>Br<sub>2</sub>N<sub>5</sub>O<sub>4</sub>Na]<sup>+</sup> (M+Na<sup>+</sup>): 587.9853, Found: 587.9850.

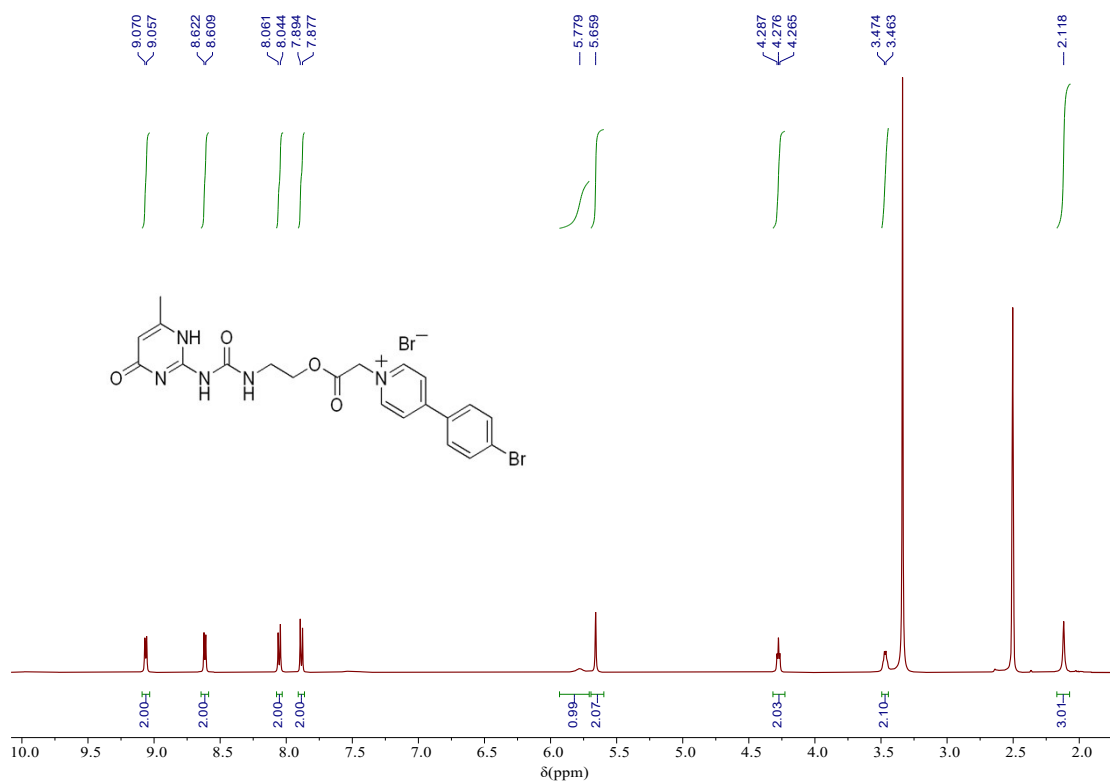

**Fig. S2.**  $^1\text{H}$  NMR spectrum (500 MHz) of Upy3-BrBP in DMSO- $d_6$ .

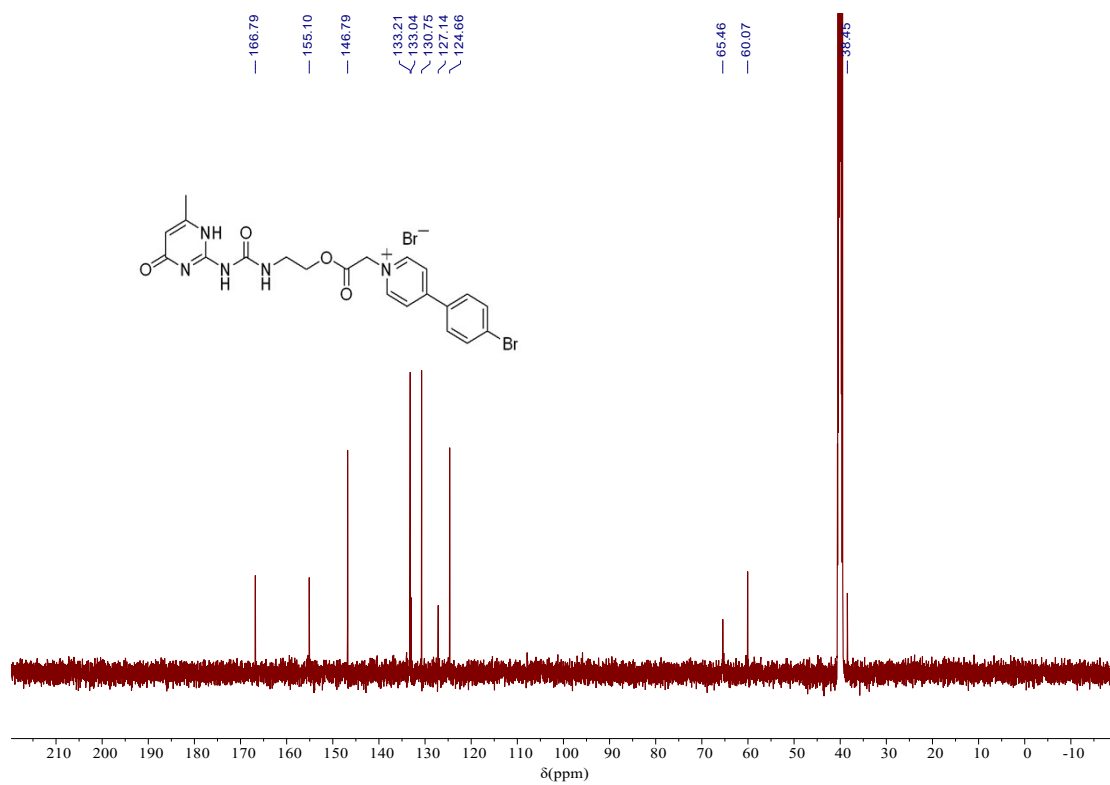

**Fig. S3.**  $^{13}\text{C}$  NMR spectrum (125 MHz) of Upy3-BrBP in DMSO- $d_6$ .

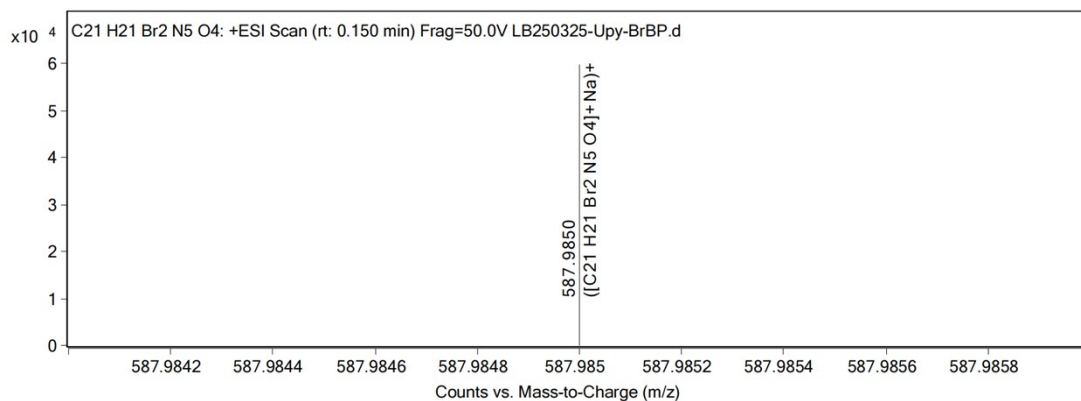

**Fig. S4.** ESI-HRMS spectrum of solid **Upy3-BrBP**.

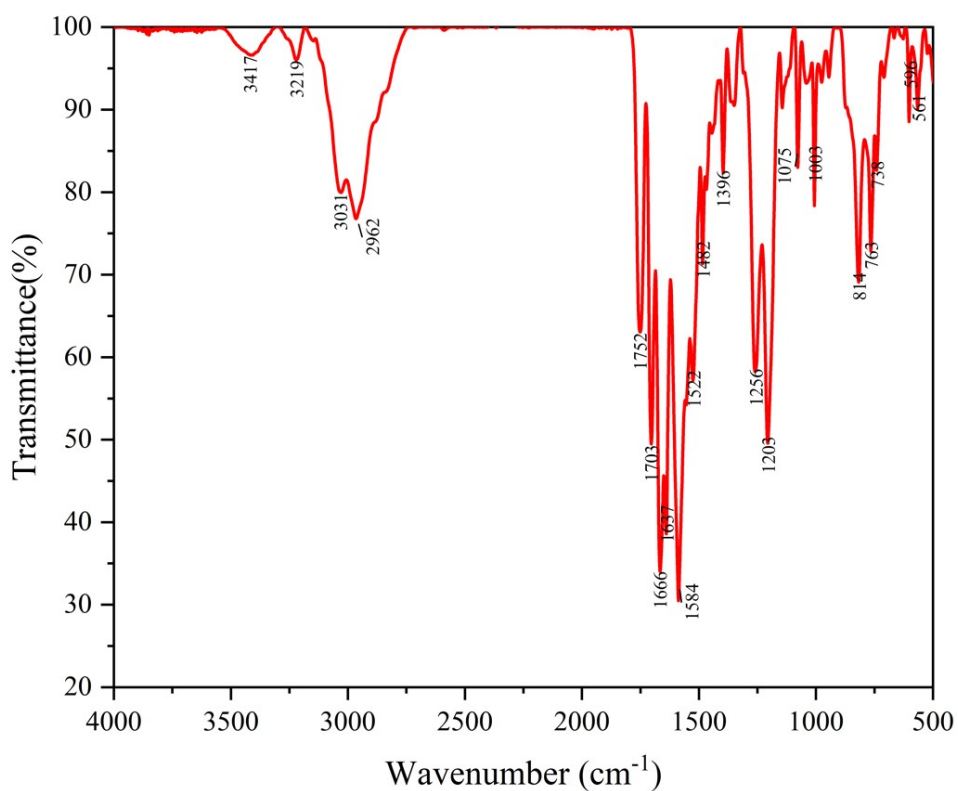

**Fig. S5.** FT-IR transmission spectrum of solid **Upy3-BrBP**, 298 K.

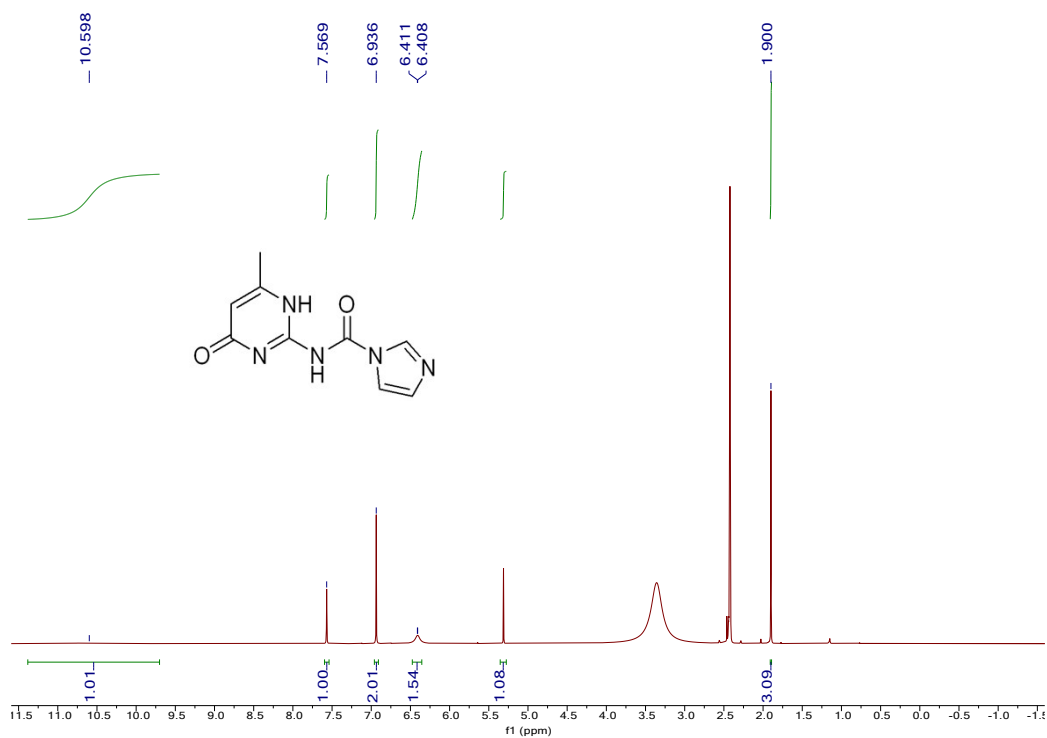

**Fig. S6.**  $^1\text{H}$  NMR spectrum (500 MHz) of Upy1 in  $\text{DMSO-}d_6$ .

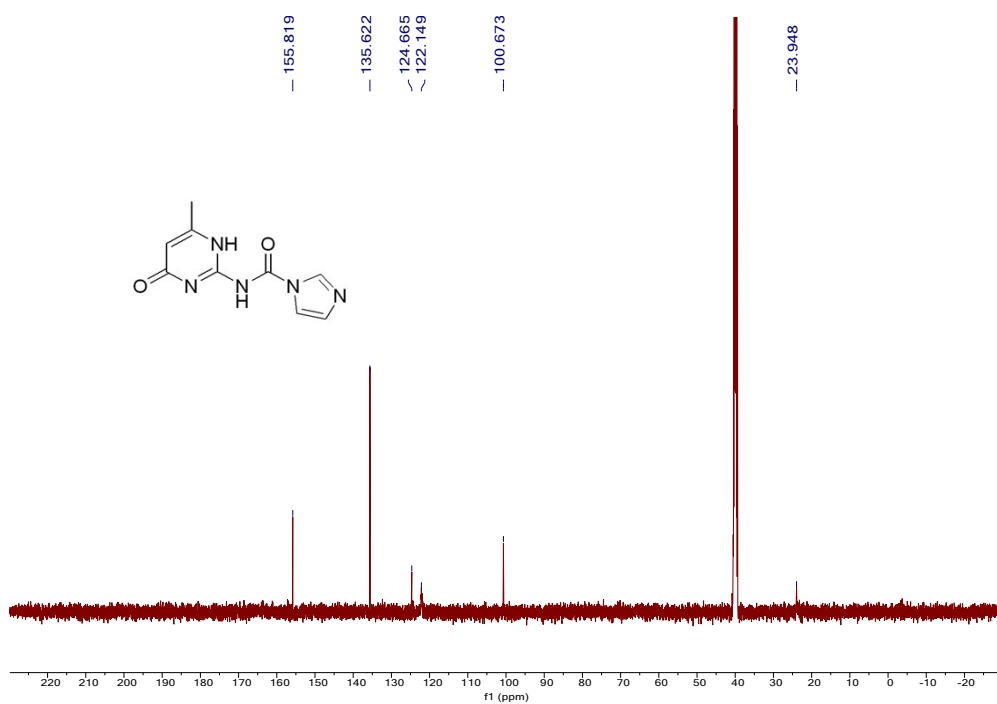

**Fig. S7.**  $^{13}\text{C}$  NMR spectrum (125 MHz) of Upy1 in  $\text{DMSO-}d_6$ .

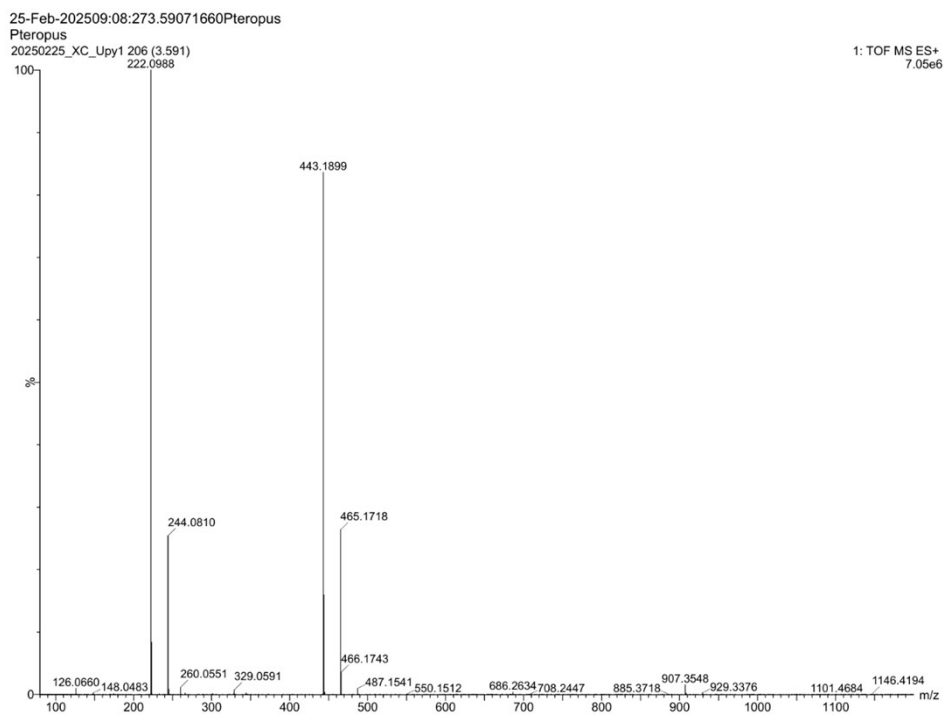

**Fig. S8.** ESI-HRMS spectrum of solid **Upy1**.

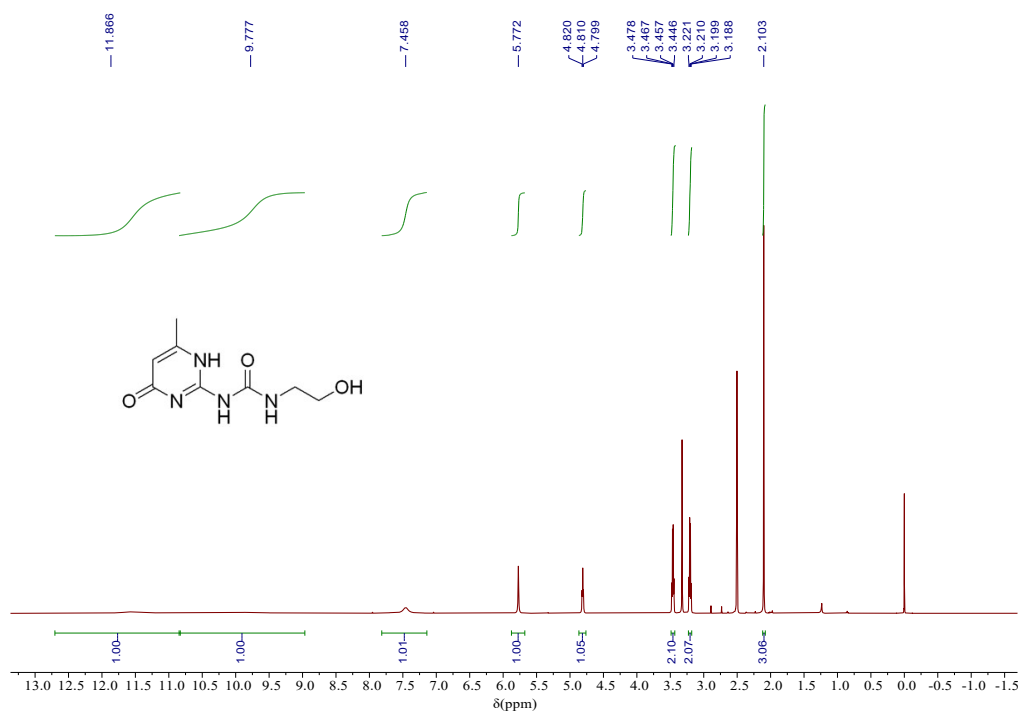

**Fig. S9.** <sup>1</sup>H NMR spectrum (500 MHz) of **Upy2** in DMSO-*d*<sub>6</sub>.

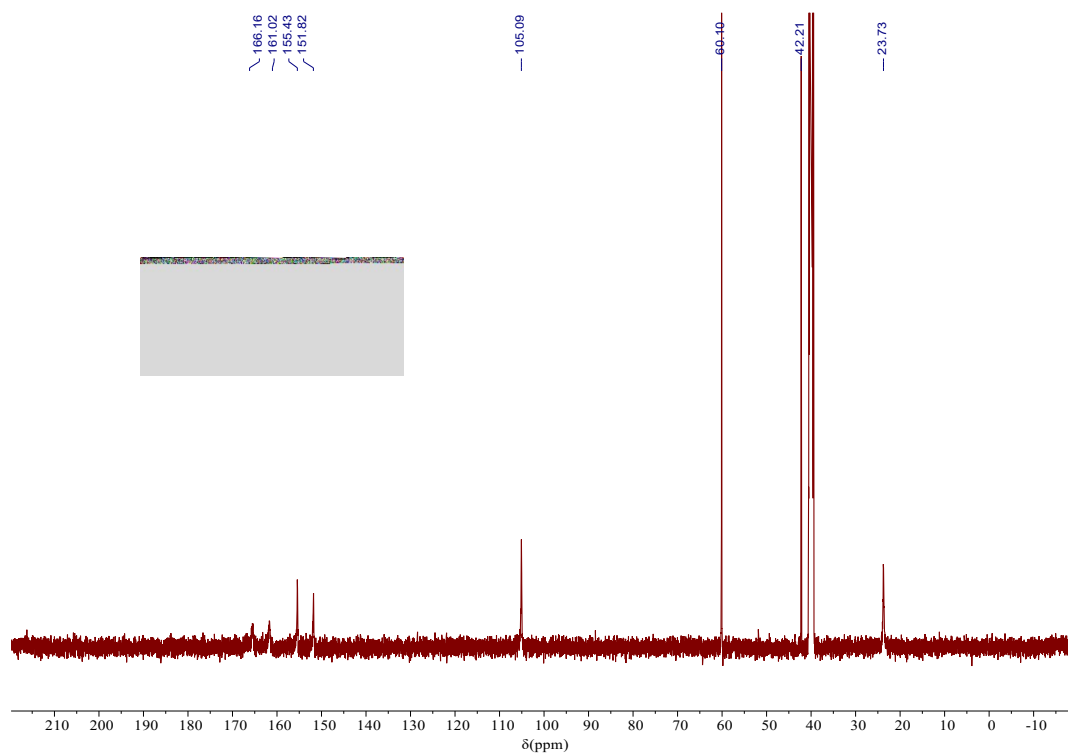

**Fig. S10.**  $^{13}\text{C}$  NMR spectrum (125 MHz) of Upy2 in  $\text{DMSO-}d_6$ .

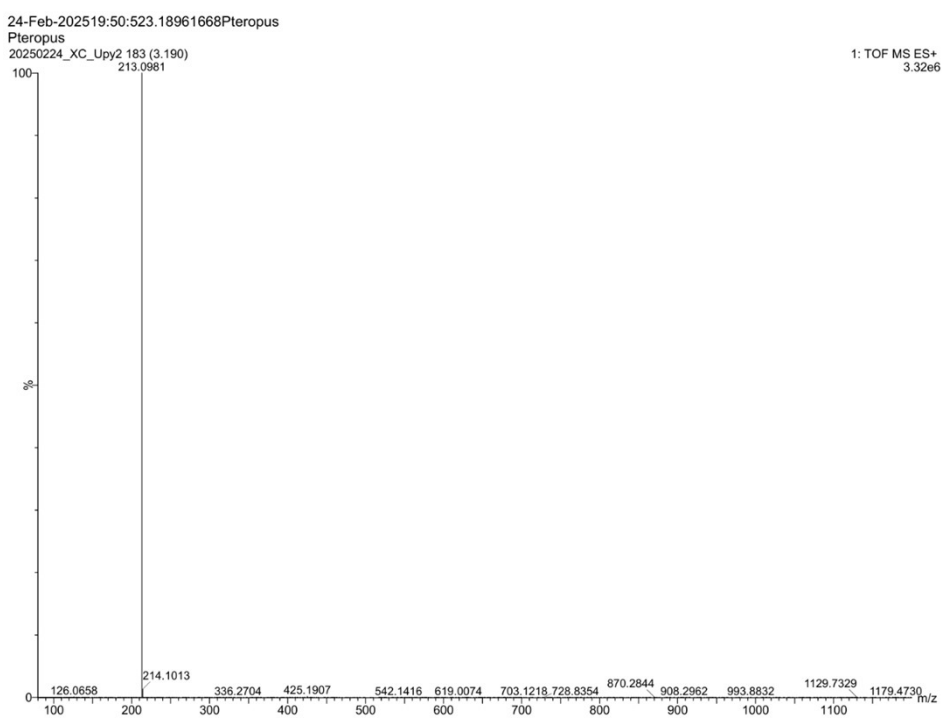

**Fig. S11.** ESI-HRMS spectrum of solid Upy2.

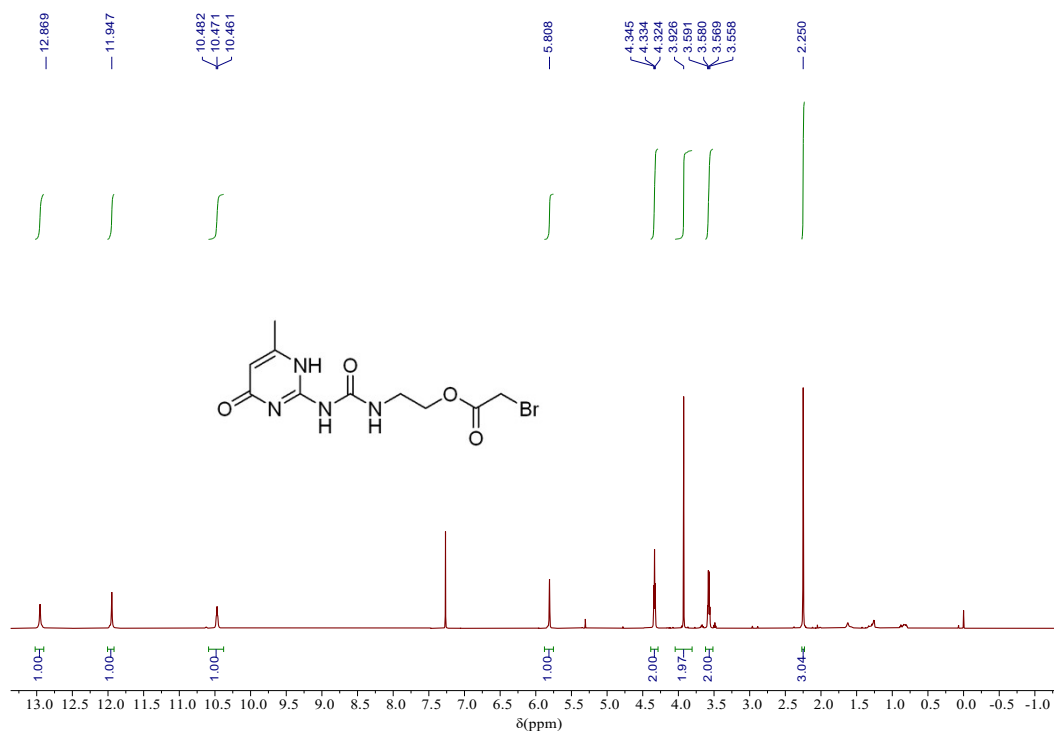

**Fig. S12.**  $^1\text{H}$  NMR spectrum (500 MHz) of **Upy3** in  $\text{CDCl}_3$ .

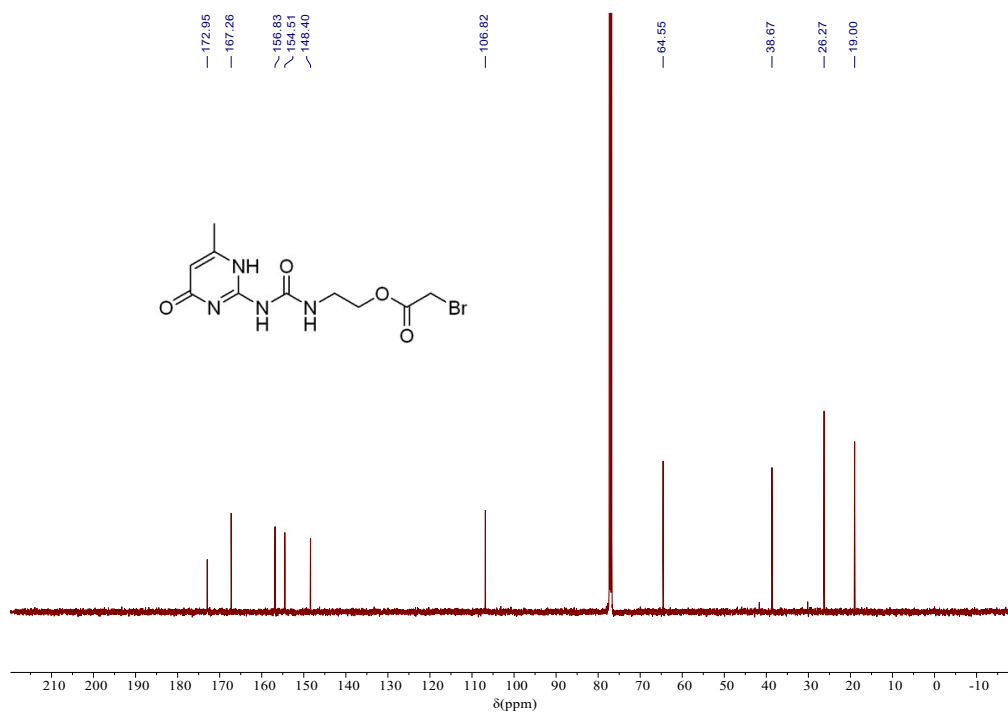

**Fig. S13.**  $^{13}\text{C}$  NMR spectrum (125 MHz) of **Upy3** in  $\text{CDCl}_3$ .

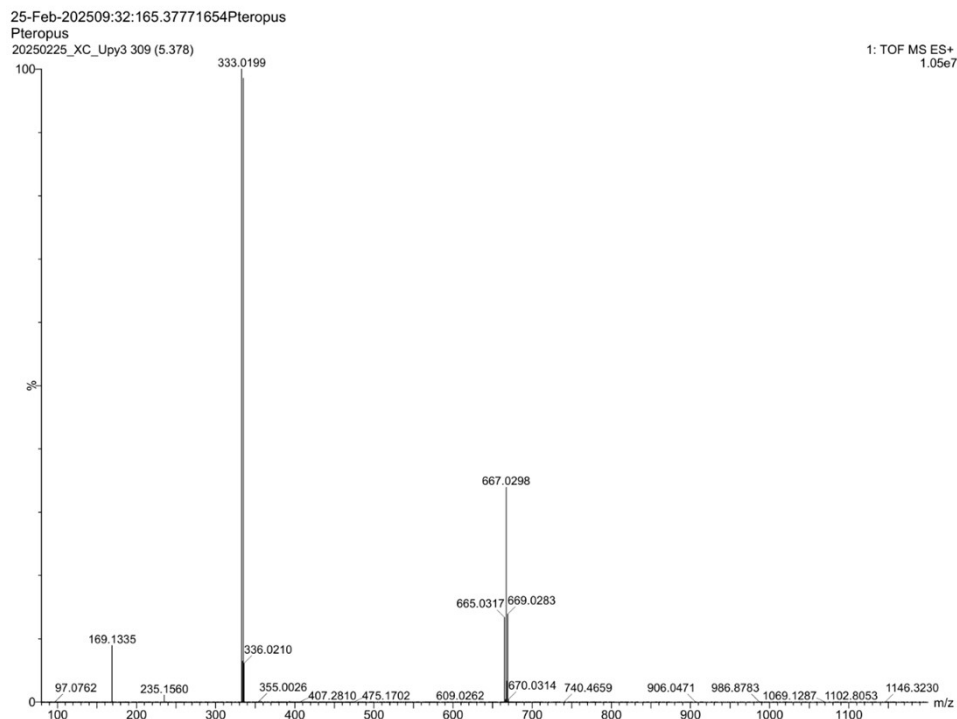

**Fig. S14.** ESI-HRMS spectrum of solid **Upy3**.

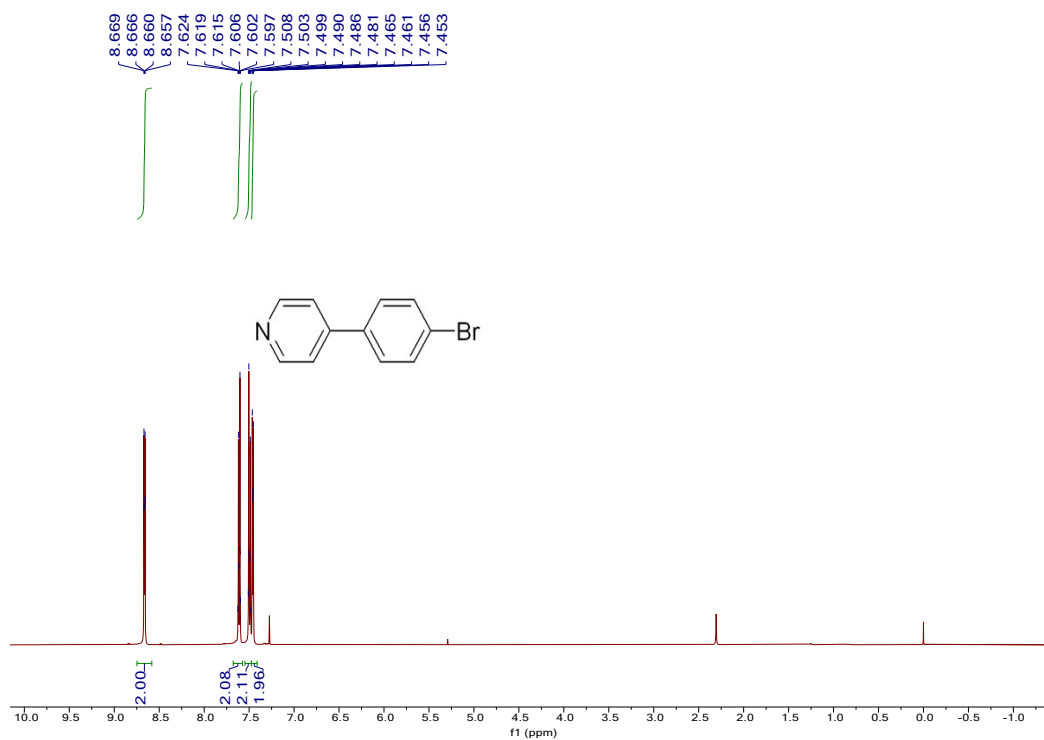

**Fig. S15.**  $^1\text{H}$  NMR spectrum (500 MHz) of **BrBP** in  $\text{DMSO-}d_6$ .

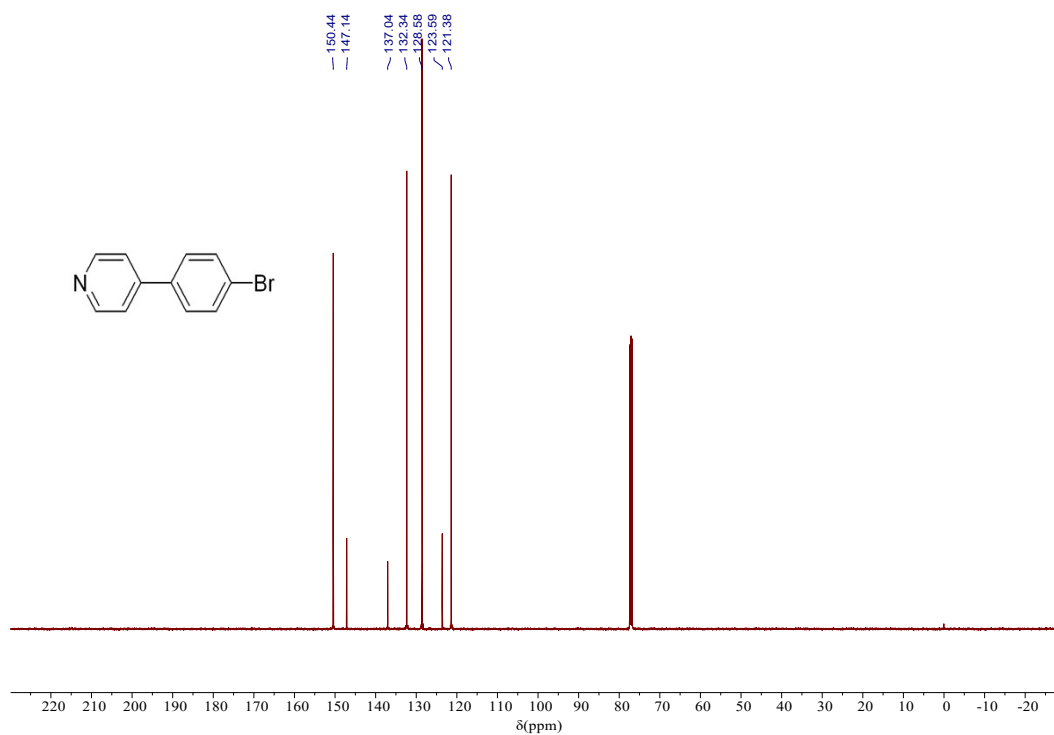

**Fig. S16.**  $^{13}\text{C}$  NMR spectrum (125 MHz) of **BrBP** in  $\text{DMSO-}d_6$ .

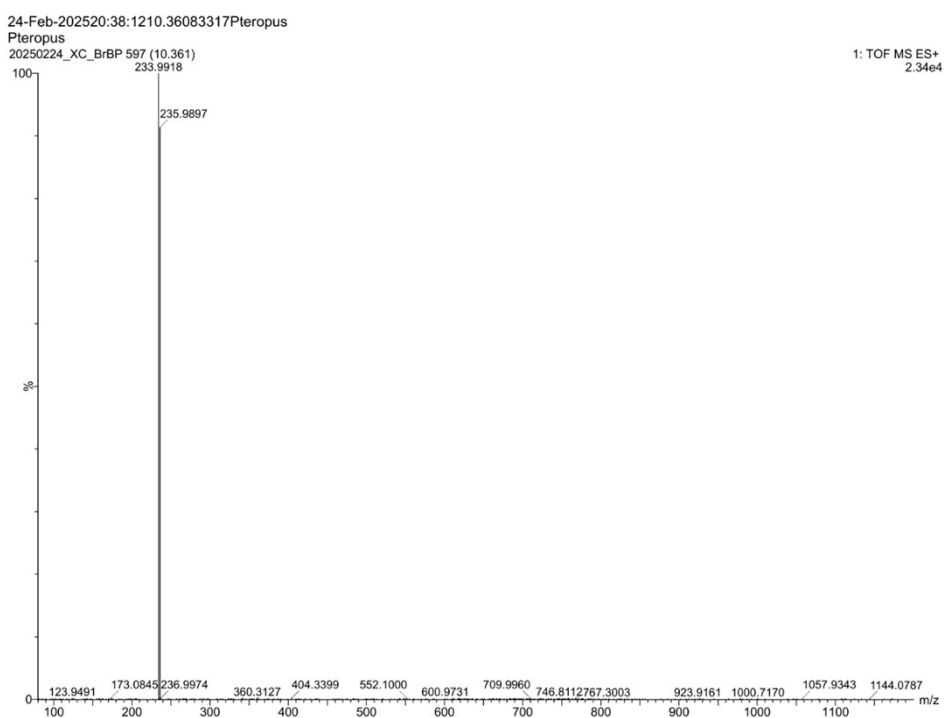

**Fig. S17.** ESI-HRMS spectrum of solid **BrBP**.

### 3. Preparation of the supramolecular gel.

The preparation method of the Upy3-BrBP-CB[8]-PVA gel is described as follows: First, PVA (1.0 g) was dissolved in ultrapure water (10 mL) to obtain a PVA solution. CB[8] (5.4 mg, 0.004 mmol) was then added to the PVA solution and stirred at 60°C until dissolved. The temperature was subsequently lowered to room temperature, and Upy3-BrBP (4.6 mg, 0.008 mmol) was added to the solution, which was stirred until it became clear. Finally, the solution was poured into a mold and frozen at -20°C for 8 hours, then thawed at room temperature for 1 hour. This freeze-thaw process was repeated four times, followed by lyophilization to obtain the supramolecular gel.

#### 4. Characterization of Upy3-BrBP-CB[n] complex.

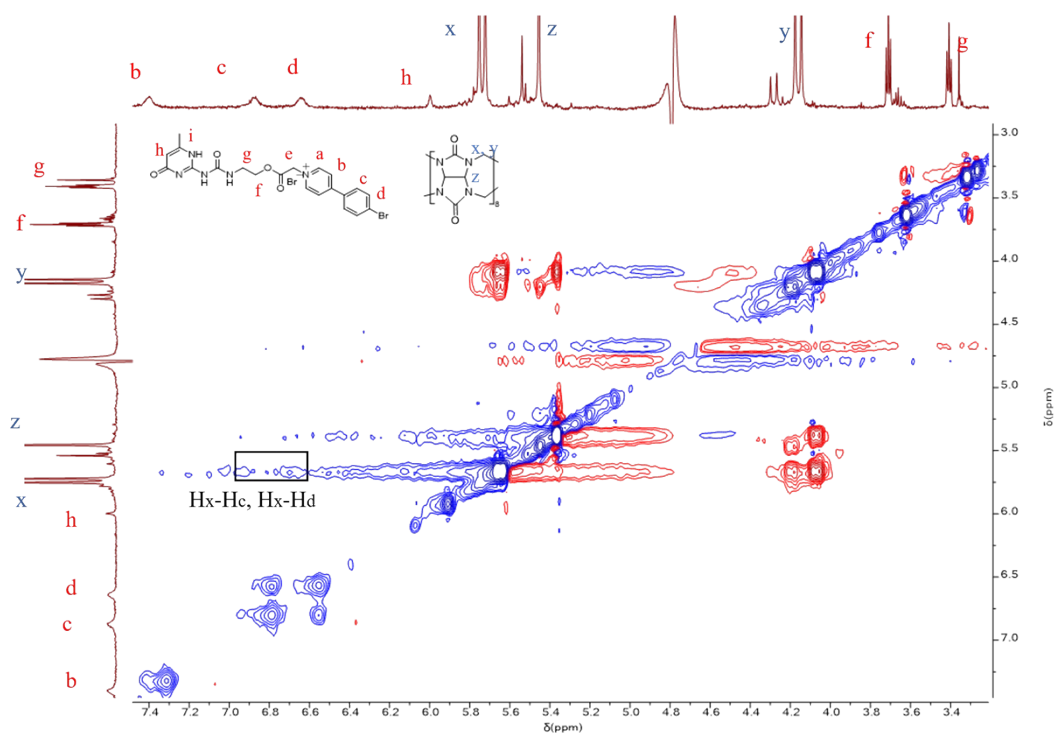

**Fig. S18** 2D ROESY NMR spectra of assembly in D<sub>2</sub>O with presaturation water suppression (500 MHz, 0.4 mM)

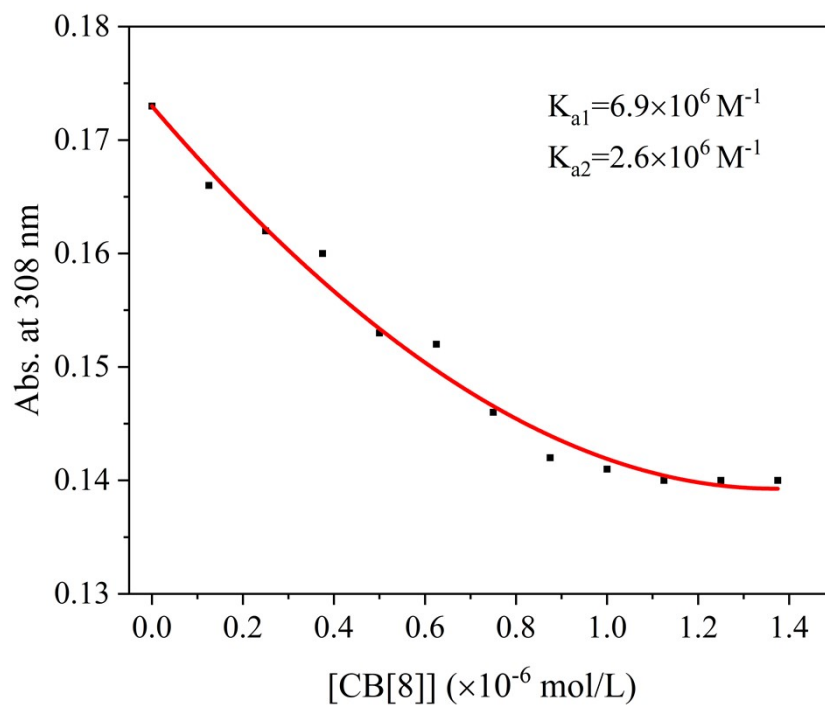

**Fig.S19** Binding isotherm obtained from UV–vis titration at 308 nm upon addition of CB[8] to the guest solution

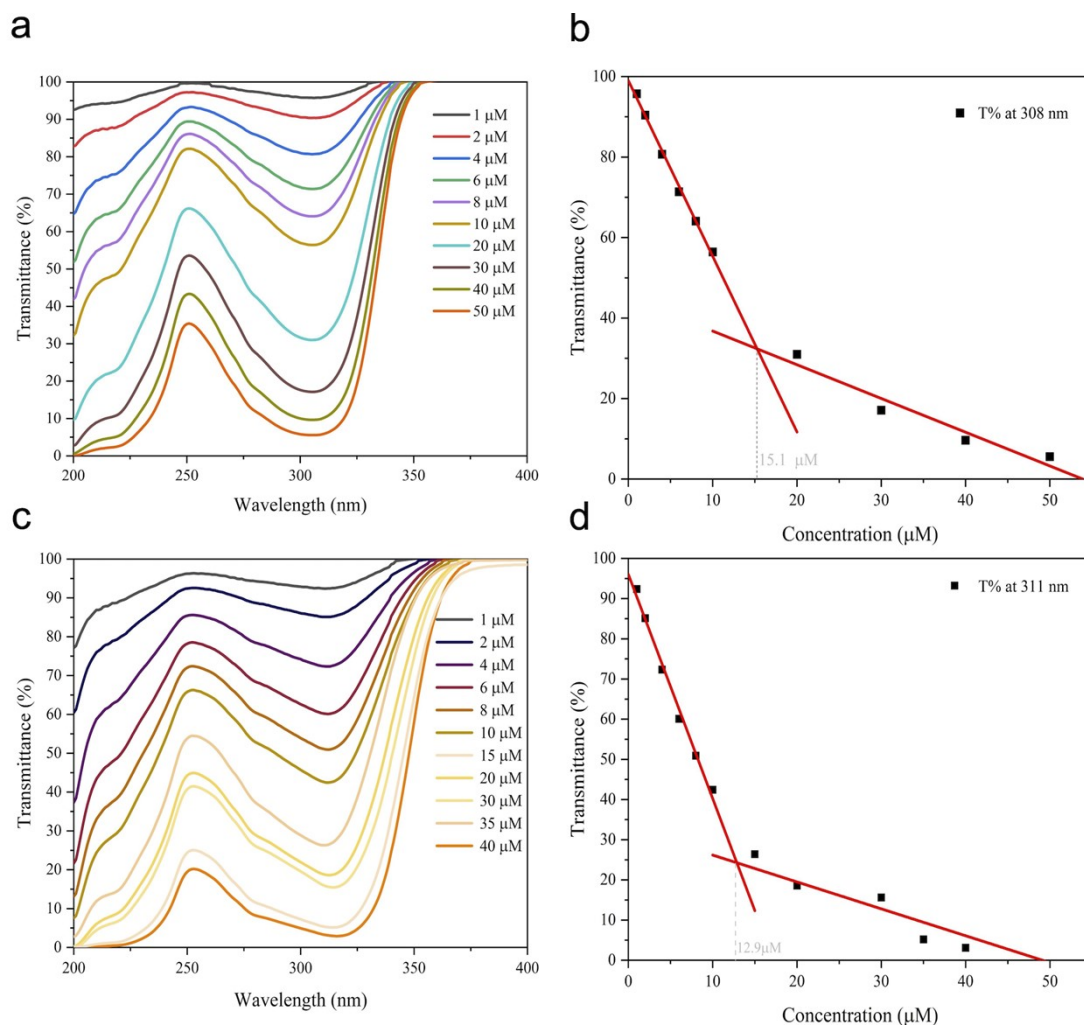

**Fig. S20** a) Spectra of transmittance percentage of **Upy3-BrBP** aqueous solution with different concentrations; b) Transmittance percentage versus concentration curve of **Upy3-BrBP** aqueous solution at 308 nm (critical micelle concentration was 15.1  $\mu\text{M}$ ); c) Spectra of transmittance percentage of **Upy3-BrBP-CB[8]** aqueous solution with different concentrations; d) Transmittance percentage versus concentration curve of **Upy3-BrBP-CB[8]** aqueous solution at 311 nm (critical micelle concentration was 12.9  $\mu\text{M}$ ).

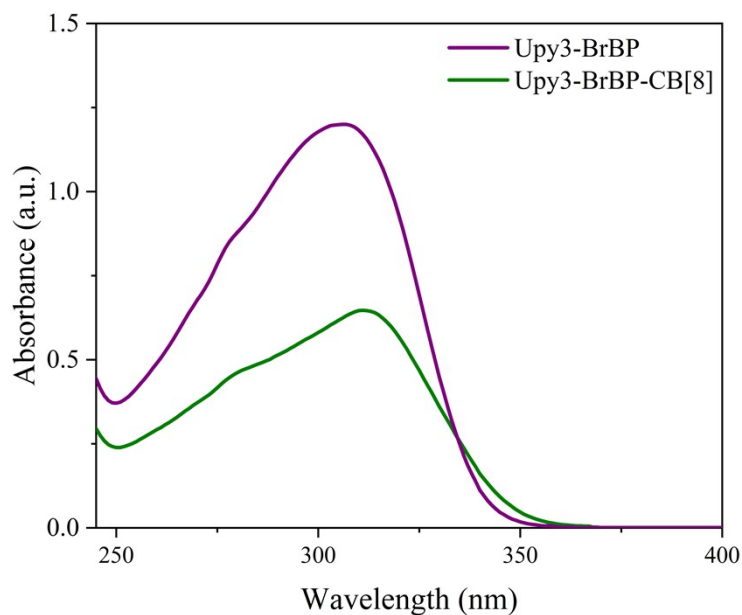

**Fig. S21** UV-vis absorption spectra of **Upy3-BrBP** and **Upy3-BrBP-CB[8]**.

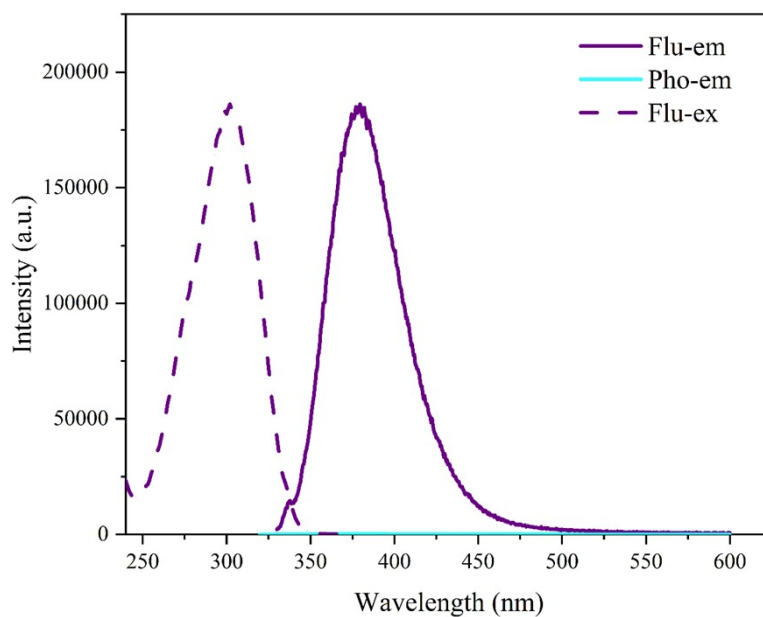

**Fig. S22** Fluorescence excitation (deep purple dashed line) and emission (deep purple solid line) spectra of aqueous **Upy3-BrBP** solution ( $5 \times 10^{-6}$  M, excitation slit = 1.8 nm emission slit = 1 nm); phosphorescence spectrum (cyan solid line) of aqueous **Upy3-BrBP** solution ( $5 \times 10^{-6}$  M,  $\lambda_{\text{ex}} = 310$  nm, excitation slit = emission slit = 5 nm, delay time = 0.1 ms)

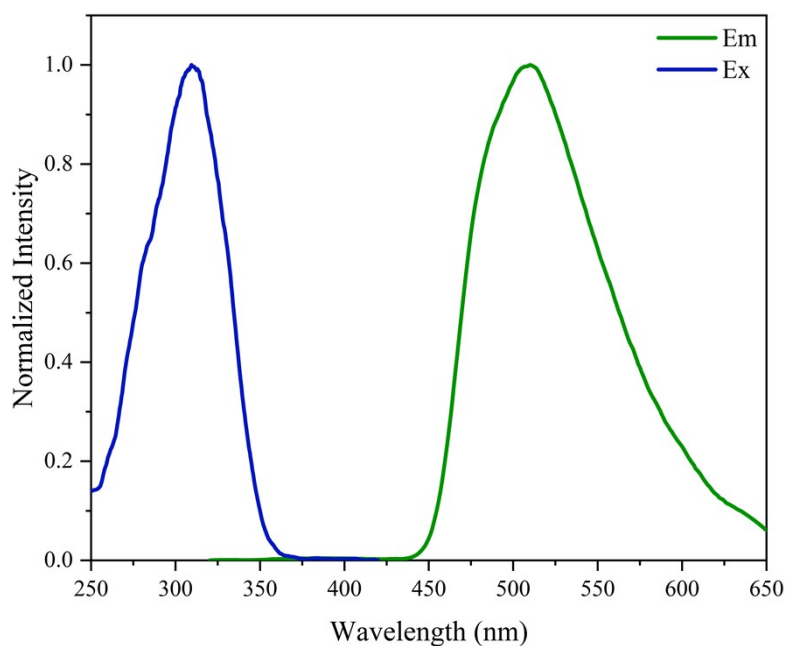

**Fig. S23** Normalized phosphorescence excitation (blue solid line) and phosphorescence emission (green solid line) of **Upy3-BrBP-CB[8]** ( $5 \times 10^{-6}$  M, excitation slit = emission slit = 5 nm, delay time = 01 ms).

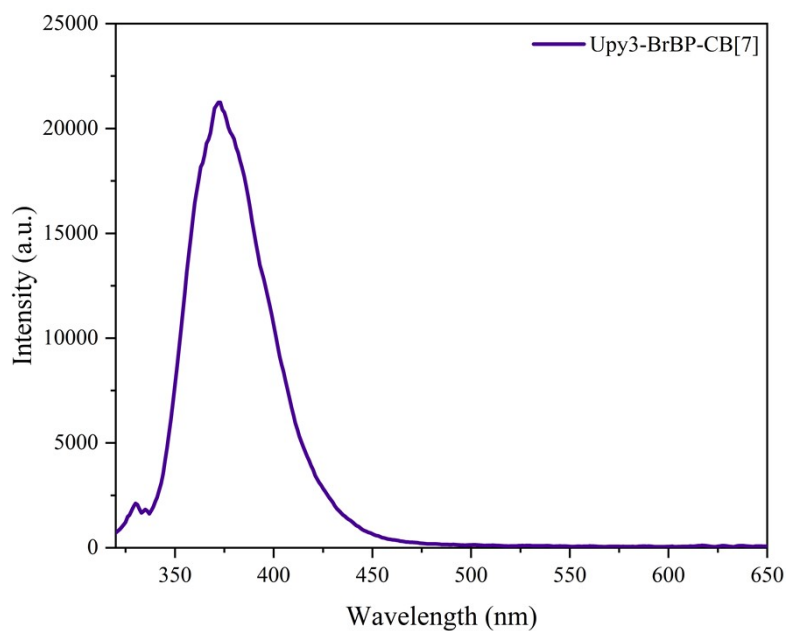

**Fig. S24** Photoluminescence spectrum of **Upy3-BrBP-CB[7]**.

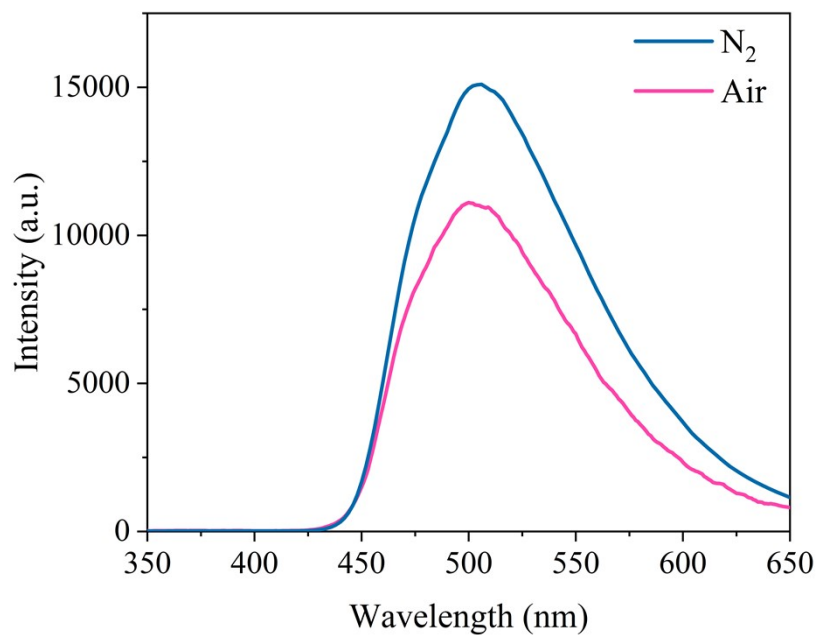

**Fig. S25** Phosphorescence emission spectra of the supramolecular gel under  $N_2$  and Air

(excitation slim = emission slim = 5 nm, delay time = 0.1 ms)

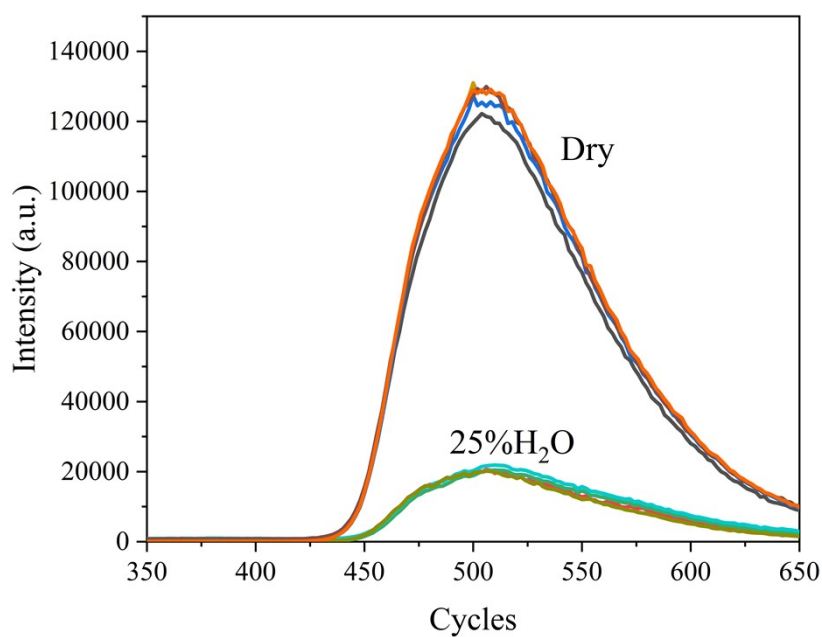

**Fig. S26** Phosphorescent emission of supramolecular gels under different drying-hydration cycles

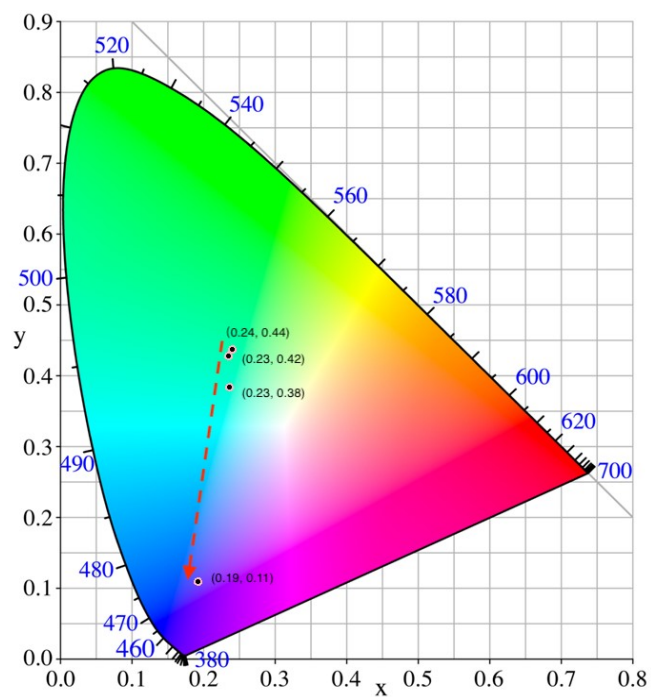

**Fig. S27** The CIE coordinated diagram of supramolecular gels with different water content (from top right to bottom left: 5%, 10%, 20%, 50%).

**Table S1** Luminescent properties of supramolecular gels with different host-guest ratios

| Host-guest content (%) | Life time (ms) | Pl. QY (%) | Phos. QY (%) |
|------------------------|----------------|------------|--------------|
| 0.5                    | 3.92           | 14.49      | 13.89        |
| 1.0                    | 4.98           | 19.21      | 18.84        |
| 1.5                    | 4.84           | 10.93      | 10.86        |

## 5. SEM images of assembly in solution and supramolecular gels.

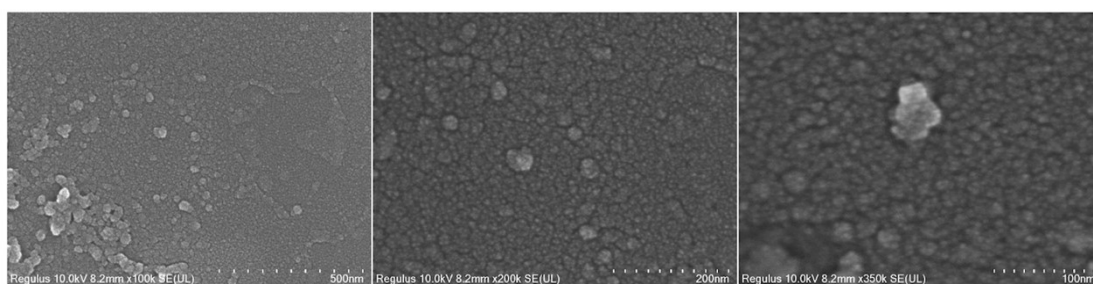

**Fig. S28.** SEM images of **Upy3-BrBP-CB[8]** prepared from aqueous concentration of 10  $\mu$ M.

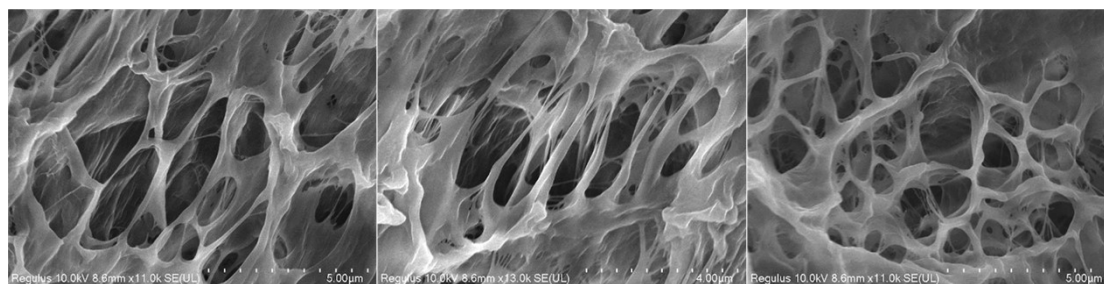

**Fig. S29.** SEM images of RTP gel with a supramolecular assembly content of 0.5%.

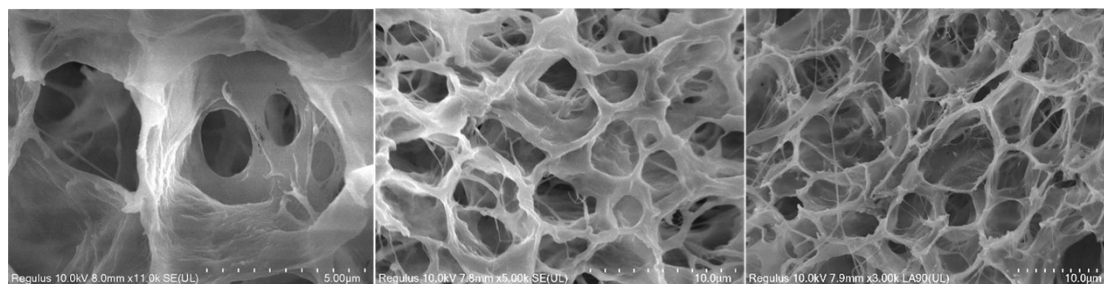

**Fig. S30.** SEM images of RTP gel with a supramolecular assembly content of 1.0%.

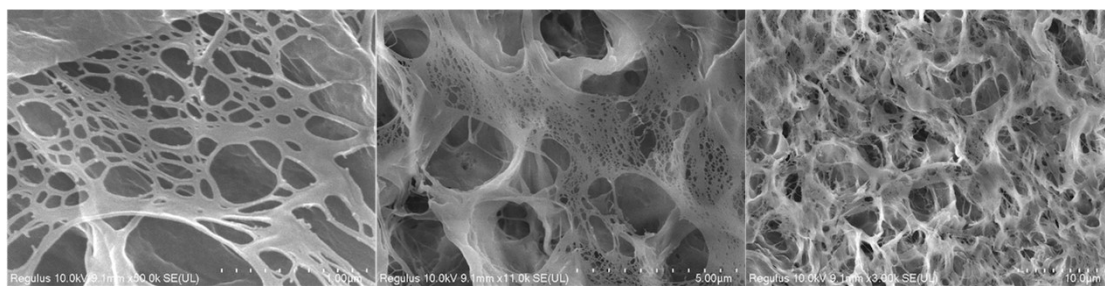

**Fig. S31.** SEM images of RTP gel with a supramolecular assembly content of 1.5%.

## 6. References.

[1] P. Y. W. Dankers, P. J. H. M. Adams, D. W. P. M. Löwik, J. C. M. van Hest, E. W. Meijer, *Eur. J. Org. Chem.* **2007**, 3622–3632.

[2] H. L. Ozores, M. Amorín, J. R. Granja, *J. Am. Chem. Soc.* **2017**, *139*, 776.
